# Supplementary material for: TaKLU Plays as a Time Regulator of Leaf Growth via Auxin Signaling
Source: MDPI journal article supplement (doi:10.3390/ijms23084219), 2022-04-11
Supplement: s1 [file s1]

## ***TaKLU* Plays as a Time Regulator of Leaf Growth via Auxin Signaling**

### **Supplementary Material**

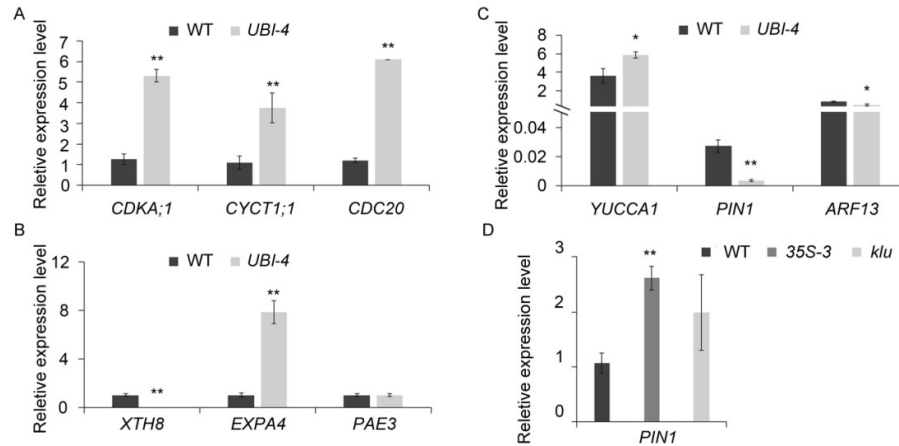

Supplementary Figure S1 Quantitative Real-time PCR analysis of the expression level of related genes in wheat and *Arabidopsis*. (A-C) Analysis of the expression levels of cell cycle (A), cell wall (B) and auxin (C) related genes in transgenic wheat (*UBI-4*) leaves. (D) Analysis of the expression levels of auxin (D) related gene in transgenic *Arabidopsis* (*35S-3*) leaves. All samples were taken from seedling leaves of different genotypes plants. Bars indicate SE (n > 3). Asterisks (\*) and (\*\*) indicate significant differences from their WT at P < 0.05 and P < 0.01 (t-test), respectively.

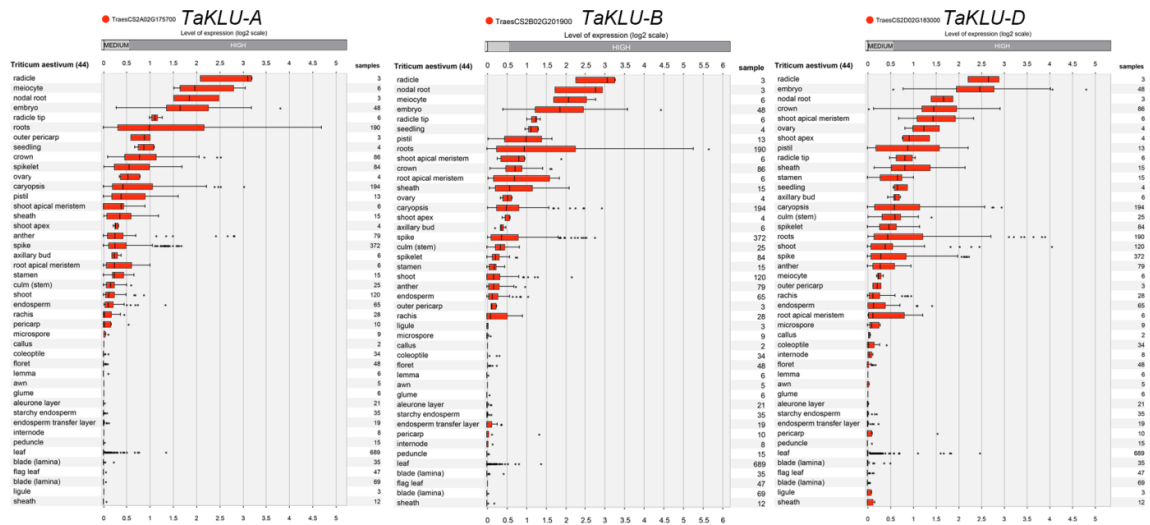

Supplementary Figure S2 *TaKLU* organization expression pattern analysis using the public network databases. *TaKLU* organization expression pattern analysis using the Genevestigator software (<https://www.bits.vib.be/software-overview/genevestigator>).

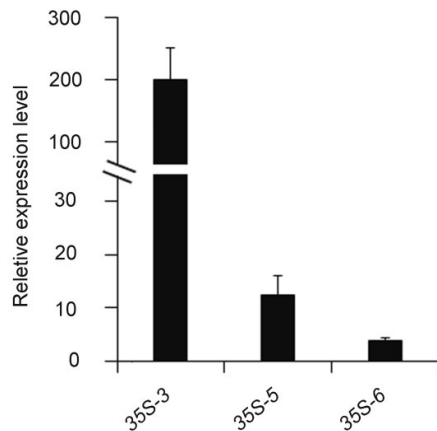

Supplementary Figure S3 The expression level of *TaKLU* in *Arabidopsis* was analyzed by Quantitative Real-time PCR. All samples about

*Arabidopsis* were taken from lateral inflorescences of different genotypes plants.

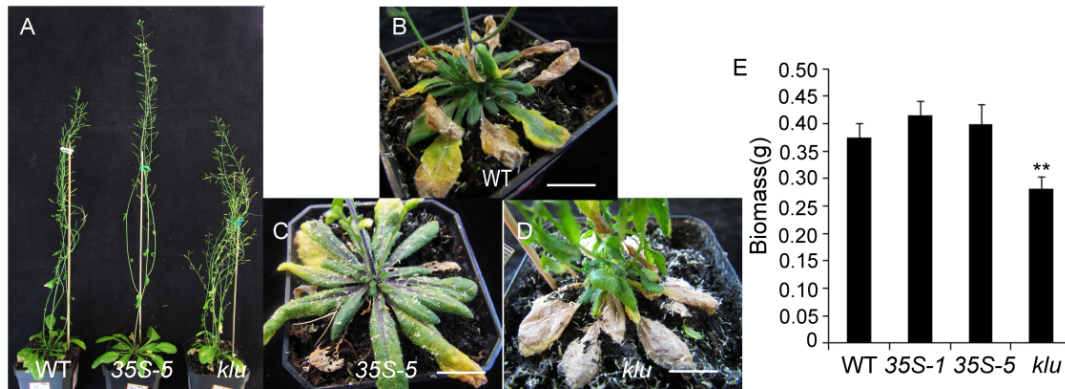

Supplementary Figure S4 *KLU* activity affects the apical dominance and longevity in *Arabidopsis*. (A) WT, *35S::TaKLU* (*35S-5*) and *klu* mutant plants at 70 days after germination. (B-D) Comparison of the leaf senescence of different genotypes at 70 days after germination. (E) Statistical analysis of biomass between different genotypes *Arabidopsis* ( $n > 7$ ). Plants grown in the same environment were harvested and used for biomass determination after they completely dry. Bars indicate SE. Size bars represent 2 cm (B-D). Asterisks (\*) and (\*\*) indicate significant differences from their WT at  $P < 0.05$  and  $P < 0.01$  (t-test), respectively.

Supplementary Table S1 Primers used for Vector Construction

| Primers' name                 | Sequence 5' to 3'              |
|-------------------------------|--------------------------------|
| TaKLU-cDNA-F ( <i>Xba</i> I)  | TGCACGCGTCGATCTTTCCATGGTTACCGG |
| TaKLU-cDNA-R ( <i>Bgl</i> II) | AGAAGATCTCGAGCCACGGCCCTGCAGA   |
| pAtKLU-F ( <i>Eco</i> R I)    | ACGGAATTCTGGTCTGGCTTTAGGACGATC |
| pAtKLU-F ( <i>Xba</i> I)      | TGCACGCGTCTCAGGCTGAGTTATGGCAG  |

Supplementary Table S2 Primers used for *TaKLU* analyses

| Primers' name | Sequence 5' to 3'        |
|---------------|--------------------------|
| TaKLU-RT-F    | GACATGATCGCCGTCCTTTG     |
| TaKLU-RT-R    | ACGATGCACTGGATGTAGGG     |
| UBC-F         | CTGCGACTCAGGGAATCTTCTAA  |
| UBC-R         | TTGTGCCATTGAATTGAACCC    |
| ACTIN-F       | AAATCTGGCATCACACTTTCTAC  |
| ACTIN-R       | GTCTCAAACATAATCTGGGTCATC |

---

|                |                          |
|----------------|--------------------------|
| TaYUCCA1-RT-F  | TGGATCGATTCATCCTGGCG     |
| TaYUCCA1-RT-R  | GTCACCTCCTTCACTGCTCC     |
| AtPIN1-RT-F    | GGCATGGCTATGTTCAGTCTTGGG |
| AtPIN1-RT-R    | ACGGCAGGTCCAACGACAAATC   |
| TaPIN1-RT-F    | GGACCCGAACAACAATGGGA     |
| TaPIN1-RT-R    | CAGACGAGCGACCAGATGAG     |
| TaARF13-RT-F   | AGATCTCCGAGACGACCCTT     |
| TaARF13-RT-R   | GAAGAGGGCAGCTCAGTGAG     |
| AtCDKA;1-RT-F  | ACTGGCCAGAGCATTCTCGGTATC |
| AtCDKA;1-RT-R  | TCGGTACCAGAGAGTAACAACCTC |
| TaCDKA;1-RT-F  | TGGCCAGGTGTTTCTTCGTT     |
| TaCDKA;1-RT-R  | GGCAGTTCGGGCATTGATTC     |
| AtCYCT1;1-RT-F | AGGATGGTAGGCGGTTATGTCAGG |
| AtCYCT1;1-RT-R | AAGCAAAGCGACGTCCTCAGAC   |
| TaCYCT1;1-RT-F | GCACCATCCTTACAAGCCCT     |

---

---

|                |                          |
|----------------|--------------------------|
| TaCYCT1;1-RT-R | CCAAGCCTTCTCACCGTCAT     |
| AtCDC20-RT-F   | GGATTCTGCATCCAACCGTCAAC  |
| AtCDC20-RT-R   | TCCATGCCAGTGATCCTACTCTTG |
| TaCDC20-RT-F   | ATGGCCATACTTCCCGTGTC     |
| TaCDC20-RT-R   | TCGGAGCATCAGGAAACACA     |
| AtXTH8-RT-F    | TCTATCGCAGCAACACCGACAC   |
| AtXTH8-RT-R    | TGCTTTGTCTGAAATCCACATCCG |
| TaXTH8-RT-F    | GTTCAACACTGACGGCACC      |
| TaXTH8-RT-R    | CCTGTCCAGAAGCGTCGTAT     |
| AtEXPA4-RT-F   | GCAGGGTGCCATGTAGAAAGAGAG |
| AtEXPA4-RT-R   | TCATCCAACCAGTCCGTGATCC   |
| TaEXPA4-RT-F   | TTCCTCCACATCGCGCAGTA     |
| TaEXPA4-RT-R   | AGGTTGAAGTAGGAGTGGCC     |
| AtPAE3-RT-F    | TATGACGCTTGGCAGGTACAAG   |
| AtPAE3-RT-R    | TCCAAGAGCCGCTTAGGTCAAC   |

---

---

|             |                      |
|-------------|----------------------|
| TaPAE3-RT-F | CAATCGTCTAGCCTGCAACG |
|-------------|----------------------|

|             |                      |
|-------------|----------------------|
| TaPAE3-RT-R | CATTCCAAGTAGCCGGGACC |
|-------------|----------------------|

---
